# Supplementary material
Source: PubMed Central journal article supplement (PMC3742491)

## **Supplemental Material to:**

**Polina S. Babich, Alexey N. Skvortsov, Paolo Rusconi,  
Nadezhda V. Tsymbalenko, Marja Mutanen, Ludmila V.  
Puchkova and Massimo Brogginì**

**Non-hepatic tumors change the activity of genes  
encoding copper trafficking proteins in the liver**

**Cancer Biology & Therapy 2013; 14(7)**

**<http://dx.doi.org/10.4161/cbt.24594>**

**<http://www.landesbioscience.com/journals/cbt/article/24594/>**

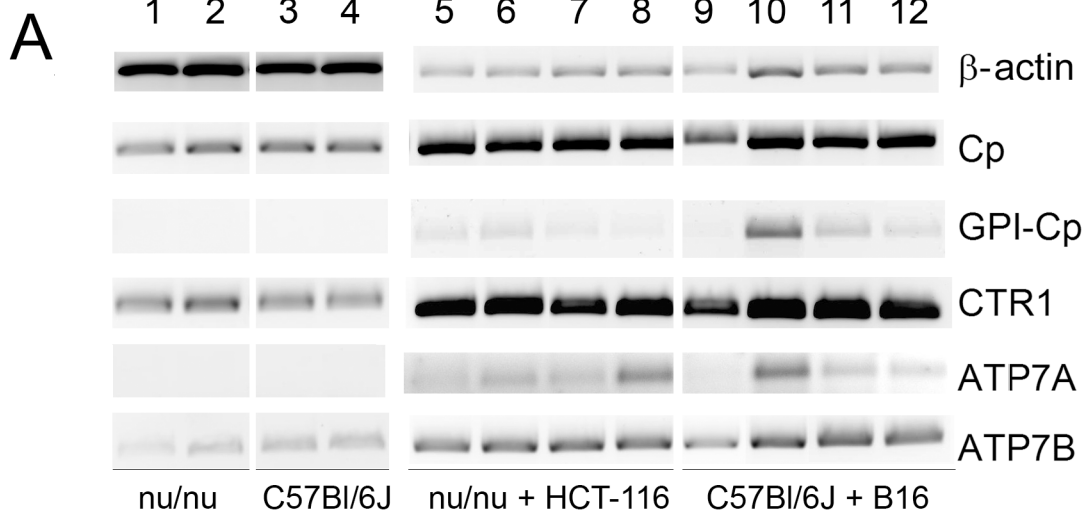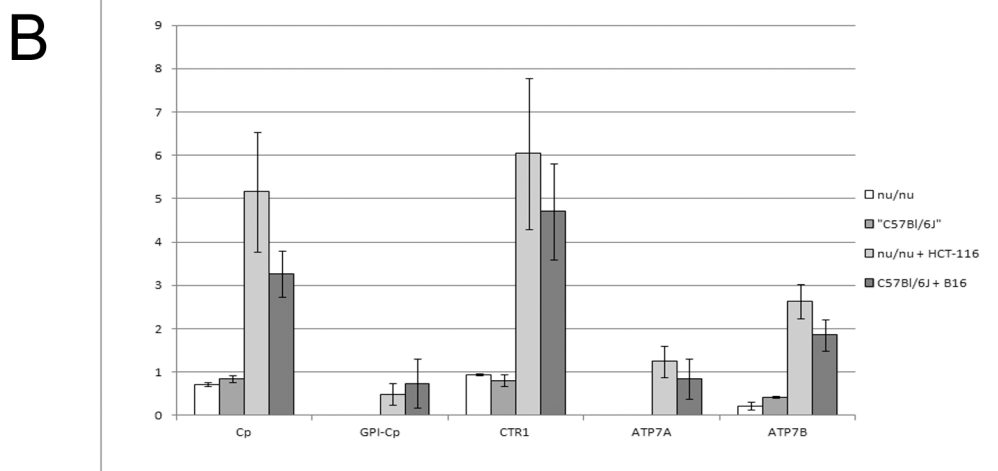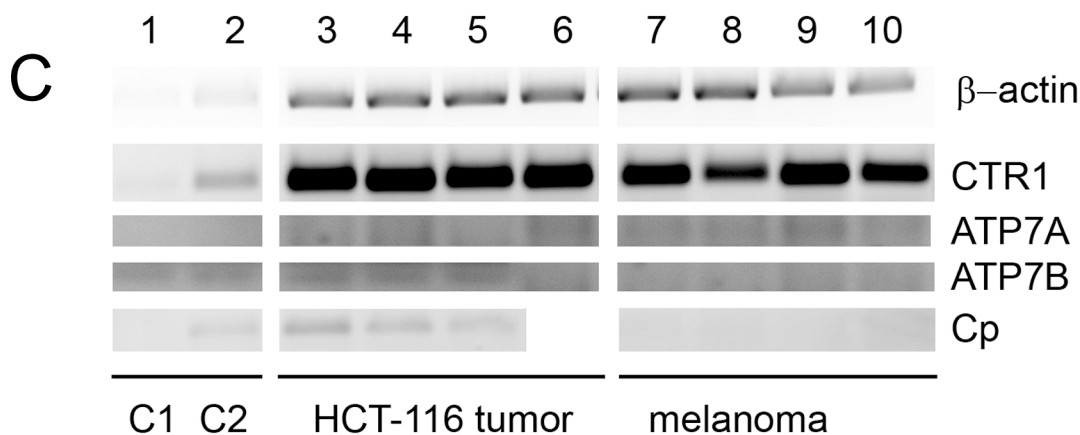

Supplement: cbt-14-614-s01.pdf [file cbt-14-614-s01.pdf]
